# Supplementary material for: Portrait of an Etruscan Athletic Official: A Multi-Analytical Study of a Painted Terracotta Wall Panel
Source: MDPI journal article supplement (doi:10.3390/heritage4040253), 2021-12-09
Supplement: s1 [file s1]

**Figure S1.** (a) spot map showing the locations of the FORS measurements (star symbols) on the Etruscan slab; (b) reflectance spectra from three iron-rich areas representative of the yellow-orange tunic, red flesh tone, and brown mantle and hair; (c) second derivative spectra.

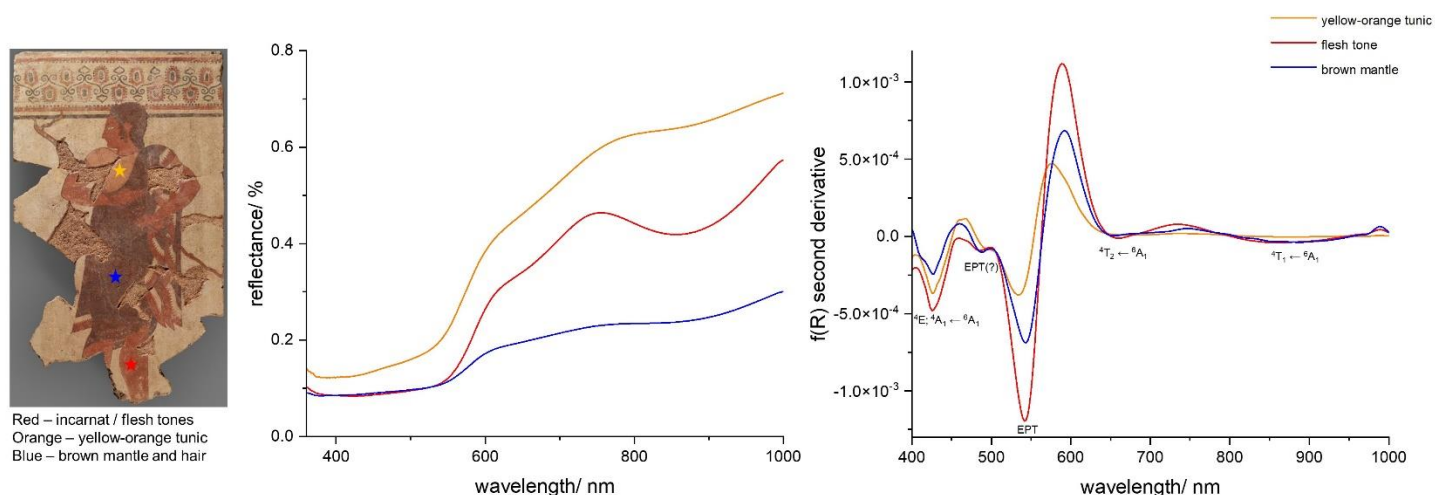

The use of derivative spectroscopy previously has been shown to help distinguish between different species of iron oxide by enhancing minor spectral features and providing better separation of overlapping absorption bands. The second derivative of the Kubelka-Munk remission function  $f(R)$  from the spectra acquired in the yellow-orange (yellow trace), red (red trace), and dark-brown (blue trace) areas (see S1c) shows that the spectra are dominated by the strong electron pair transition (EPT), occurring at 535, 541, and 543 nm, and the  ${}^4E; {}^4A_1 \leftarrow {}^6A_1$  transition at 425, 425, and 427 nm, for the yellow-orange, red, and dark-brown pigments, respectively. The two minima at longer wavelengths, assigned to the  ${}^4T_1 \leftarrow {}^6A_1$  and  ${}^4T_2 \leftarrow {}^6A_1$  transitions occur at 874/674 nm for the yellow-orange species, 900/659 nm for the red, and 874/653 nm for the dark brown. A small band located around 485-495 nm remains unassigned, but could be assigned to the electron pair transition (EPT) of a different iron oxide, therefore suggesting a mixture of multiple iron oxides [35]. Previous studies [1-3] have shown that the median EPT position for hematite is located above 500 nm, and other iron oxides (schwertmannite, maghemite, lepidocrocite, goethite, ferrihydrite, feroxyhite, and akaganeite) that may be present all have EPT below 500 nm. Closer inspection of the spectra reveal a difference in both the intensity and position of the local minimum in the 485-495 nm band, with the yellow-orange differing from the other measured areas.

1. Scheinost, A.; Chavernas, A.; Barrón, V.; Torrent, J. Use and limitations of second-derivative diffuse reflectance spectroscopy in the visible to near-infrared range to identify and quantify Fe oxide minerals in soils. *Clays and Clay Minerals* **1998**, 46, 528-536.
2. Sherman, D.M.; Waite, T.D. Electronic spectra of Fe<sup>3+</sup> oxides and oxide hydroxides in the near IR to near UV. *American Mineralogist* **1985**, 70, 1262-1269.
3. Cornell, R.; Schwertmann, U. The Iron Oxides: Structures, Properties, Reactions, Occurrences and Uses. VCH Verlagsgesellschaft GMBH, Weinheim, Germany **1996**, 533-559.

**Figure S2.** X-ray diffraction pattern for the terracotta substrate. The primary diffraction peak for each phase is labelled; a table provides the diffraction angle ( $2\theta$ ), d spacing (nm), intensity, relative intensity, and hkl information for the most abundant phases.

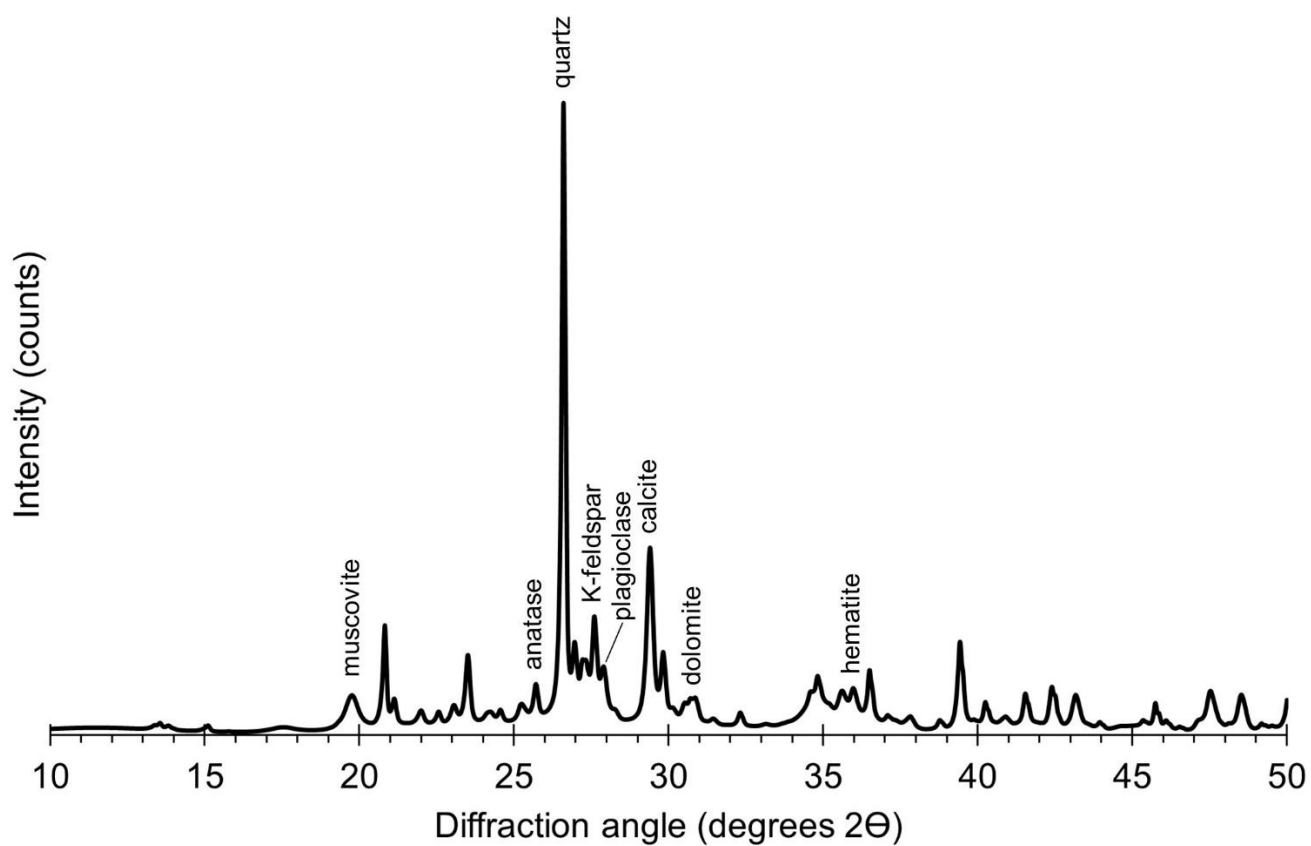

| phase              | diffraction<br>angle (2θ) | d spacing<br>(nm) | intensity | relative<br>intensity | h  | k  | l  |
|--------------------|---------------------------|-------------------|-----------|-----------------------|----|----|----|
| k-feld             | 13.58                     | 0.65              | 377       | 1.90                  | 0  | 2  | 0  |
| k-feld             | 15.14                     | 0.58              | 297       | 1.50                  | 1  | 1  | -1 |
| <b>muscovite</b>   | 19.80                     | 0.45              | 1246      | 6.28                  | 0  | 2  | 0  |
| k-feld             | 21.15                     | 0.42              | 1140      | 5.75                  | 2  | 0  | -1 |
| plagioclase        | 22.02                     | 0.40              | 769       | 3.87                  | 2  | 0  | -1 |
| k-feld             | 22.59                     | 0.39              | 731       | 3.69                  | 1  | 1  | 1  |
| calcite            | 23.07                     | 0.39              | 942       | 4.75                  | 1  | -1 | 2  |
| k-feld             | 23.53                     | 0.38              | 2512      | 12.66                 | 1  | 3  | 0  |
| plagioclase        | 24.27                     | 0.37              | 733       | 3.69                  | 1  | 3  | -1 |
| k-feld             | 24.58                     | 0.36              | 793       | 4.00                  | 1  | 3  | -1 |
| anatase            | 25.28                     | 0.35              | 977       | 4.92                  | 1  | 0  | 1  |
| k-feld             | 25.73                     | 0.35              | 1599      | 8.06                  | 1  | 1  | -2 |
| <b>quartz</b>      | 26.63                     | 0.33              | 19847     | 100.00                | 1  | -1 | 1  |
| k-feld             | 26.99                     | 0.33              | 2923      | 14.73                 | 2  | 2  | 0  |
| k-feld             | 27.23                     | 0.33              | 2378      | 11.98                 | 2  | 0  | -2 |
| k-feld             | 27.36                     | 0.33              | 2366      | 11.92                 | 0  | 4  | 0  |
| <b>k-feld</b>      | 27.62                     | 0.32              | 3724      | 18.76                 | 0  | 0  | 2  |
| <b>plagioclase</b> | 27.92                     | 0.32              | 2152      | 10.84                 | 0  | 0  | 2  |
| <b>calcite</b>     | 29.42                     | 0.30              | 5883      | 29.64                 | 1  | -1 | -4 |
| k-feld             | 29.85                     | 0.30              | 2605      | 13.13                 | 1  | 3  | 1  |
| k-feld             | 30.55                     | 0.29              | 1022      | 5.15                  | 2  | 2  | -2 |
| k-feld             | 30.73                     | 0.29              | 1158      | 5.83                  | 0  | 4  | 1  |
| <b>dolomite</b>    | 30.89                     | 0.29              | 1176      | 5.92                  | 1  | -1 | -4 |
| k-feld             | 32.34                     | 0.28              | 704       | 3.55                  | 1  | 3  | -2 |
| hematite           | 33.16                     | 0.27              | 349       | 1.76                  | 1  | -1 | -4 |
| k-feld             | 34.61                     | 0.26              | 1373      | 6.92                  | 3  | 1  | -2 |
| k-feld             | 34.85                     | 0.26              | 1856      | 9.35                  | 2  | 2  | 1  |
| <b>hematite</b>    | 35.62                     | 0.25              | 1390      | 7.00                  | 2  | -1 | 0  |
| calcite            | 35.99                     | 0.25              | 1471      | 7.41                  | 2  | -1 | 0  |
| quartz             | 36.52                     | 0.25              | 2039      | 10.27                 | -2 | 1  | 0  |
| k-feld             | 37.11                     | 0.24              | 611       | 3.08                  | 1  | 5  | -1 |
| k-feld             | 37.86                     | 0.24              | 587       | 2.96                  | 3  | 3  | -1 |
| k-feld             | 38.79                     | 0.23              | 467       | 2.35                  | 1  | 1  | -3 |
| quartz             | 39.45                     | 0.23              | 2927      | 14.75                 | 1  | -1 | -2 |
| quartz             | 40.27                     | 0.22              | 1034      | 5.21                  | 2  | -1 | -1 |
| dolomite           | 40.87                     | 0.22              | 580       | 2.92                  | 2  | -1 | -3 |
| k-feld             | 41.56                     | 0.22              | 1300      | 6.55                  | 0  | 6  | 0  |
| quartz             | 42.43                     | 0.21              | 1513      | 7.62                  | 2  | -2 | 0  |
| calcite            | 43.18                     | 0.21              | 1258      | 6.34                  | 2  | -2 | -2 |
| k-feld             | 45.37                     | 0.20              | 467       | 2.35                  | 4  | 2  | -2 |
| quartz             | 45.77                     | 0.20              | 1004      | 5.06                  | 2  | -2 | -1 |
| calcite            | 47.54                     | 0.19              | 1381      | 6.96                  | 1  | -1 | 8  |
| calcite            | 48.54                     | 0.19              | 1262      | 6.36                  | 2  | -1 | 6  |
