# Supplementary material for: Portrait of an Etruscan Athletic Official: A Multi-Analytical Study of a Painted Terracotta Wall Panel
Source: MDPI journal article supplement (doi:10.3390/heritage4040253), 2021-12-09
Supplement: s1 [file s1]

Archive with 1 entries (1 files):
- heritage-1461654-supplementary.pdf
